# Supplementary material for: A bottom-up synthesis of α-Fe2O3 nanoaggregates and their composites with graphene as high performance anodes in lithium-ion batteries
Source: Royal Society of Chemistry journal article supplement (doi:10.1039/c4ta05420b), 2014-11-25
Supplement: c4ta05420b1.pdf [file c4ta05420b1.pdf]

## Electronic Supplementary Information

### A Bottom-Up Synthesis of $\alpha$ -Fe<sub>2</sub>O<sub>3</sub> Nanoaggregates and their Composite with Graphene as Highly Performing Anode in Lithium-Ion Battery

Xueying Li,<sup>a</sup> Yuanyuan Ma,<sup>ab</sup> Lei Qin,<sup>a</sup> Zhiyun Zhang,<sup>a</sup> Zhong Zhang,<sup>a</sup> Yanzhen Zheng,<sup>a</sup> and Yongquan Qu<sup>\*ab</sup>

<sup>a</sup> Center for Applied Chemical Research, Frontier Institute of Science and Technology, Xi'an Jiaotong University, Xi'an, China, 710049

<sup>b</sup> State Key Laboratory for Mechanical Behavior of Materials, Xi'an Jiaotong University, Xi'an 710049, China

\*E-mail: [yongquan@mail.xjtu.edu.cn](mailto:yongquan@mail.xjtu.edu.cn)

#### XRD simulation:

The simulated powder X-ray diffraction plot was obtained from the single crystal data using Mercury software. Single-crystal X-ray diffraction data of compound polymeric iron(III) acetate was recorded on a Bruker Apex CCD II area-detector diffractometer with graphite-monochromated MoK radiation ( $\lambda=0.71073$  Å) at 100 K. The more information could be found in the previous paper (*Angew. Chem. Int. Ed.*, 2007, **46**, 6076-6080).

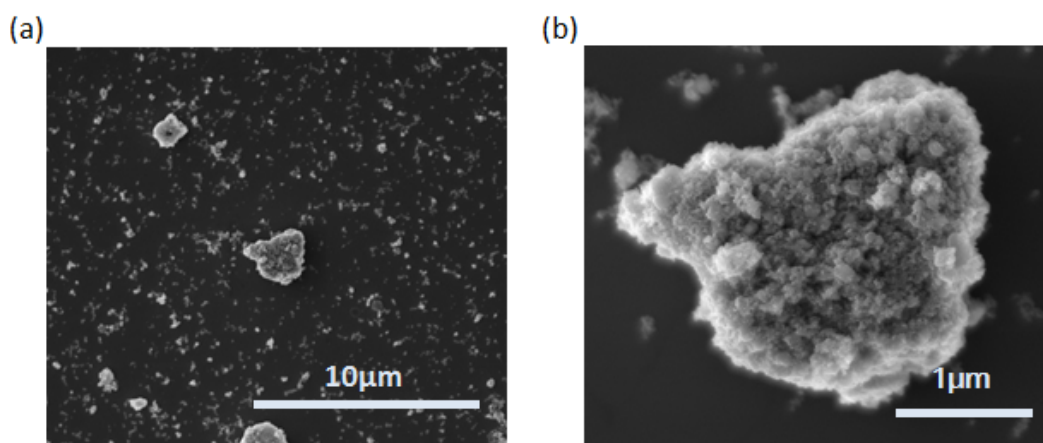

**Fig. S1** TEM images of iron oxide which treated by hydrothermal at 200 °C for 24h with the equivalent amounts of FeCl<sub>3</sub>·6H<sub>2</sub>O and NaAc.

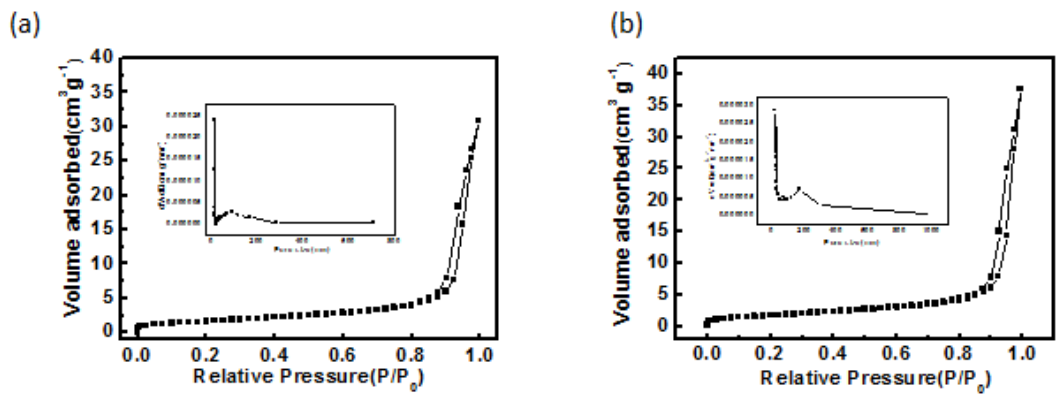

**Fig. S2** (a) N<sub>2</sub> adsorption-desorption isotherms and pore-size distribution curves of  $\alpha$ -Fe<sub>2</sub>O<sub>3</sub> nanoaggregates; (b) N<sub>2</sub> adsorption-desorption isotherms and pore-size distribution curves of  $\alpha$ -Fe<sub>2</sub>O<sub>3</sub>@rGO nanoaggregates;

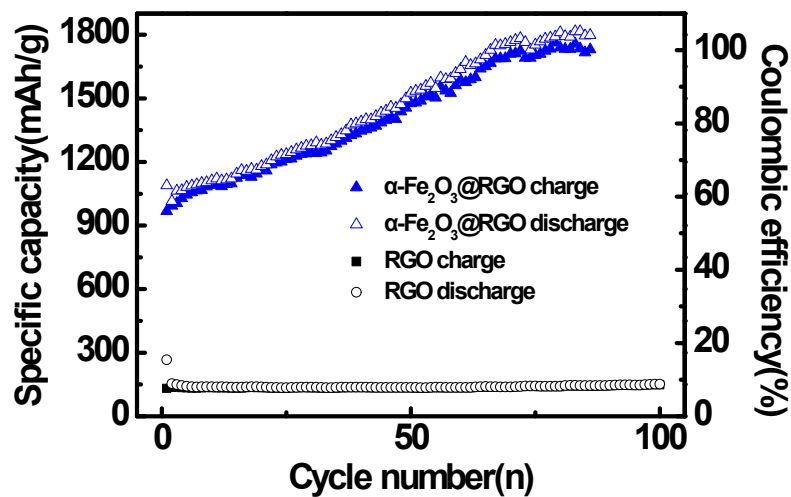

**Fig. S3** Cycling performance of  $\alpha$ -Fe<sub>2</sub>O<sub>3</sub>@rGO and reduced graphene oxide (rGO) electrodes at a current density of 100 mA g<sup>-1</sup>. Blue triangles represent the  $\alpha$ -Fe<sub>2</sub>O<sub>3</sub>@rGO electrode. Black circles represent the rGO electrode.
